# Supplementary material for: Enhanced Wettability, Hardness, and Tunable Optical Properties of SiCxNy Coatings Formed by Reactive Magnetron Sputtering
Source: MDPI journal article supplement (doi:10.3390/ma16041467), 2023-02-09
Supplement: s1 [file s1]

## Supplementary Materials

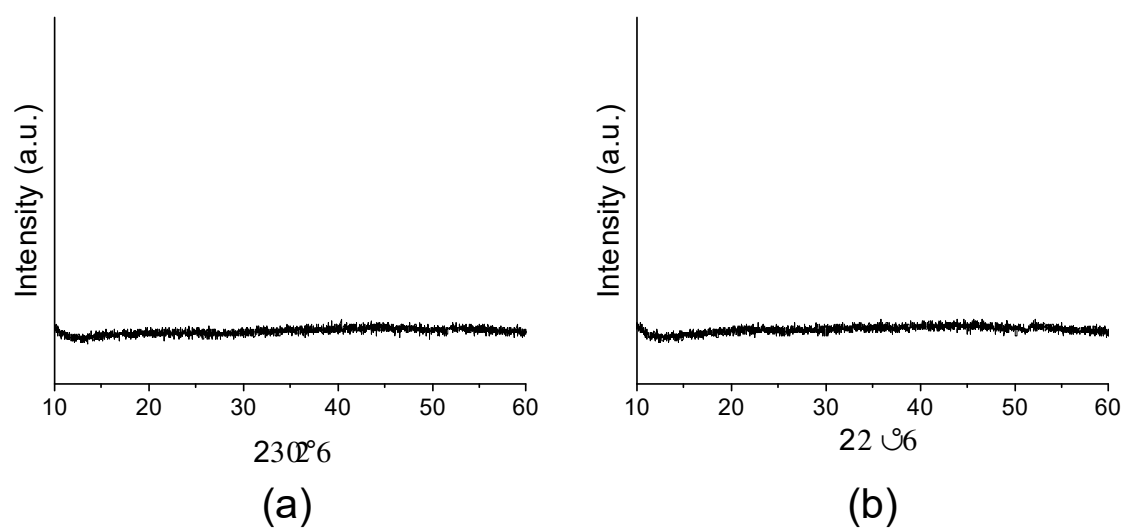

**Figure S1.** XRD patterns of SiC<sub>x</sub>N<sub>y</sub> films sputtered at (a) 25 and (b) 300 °C.

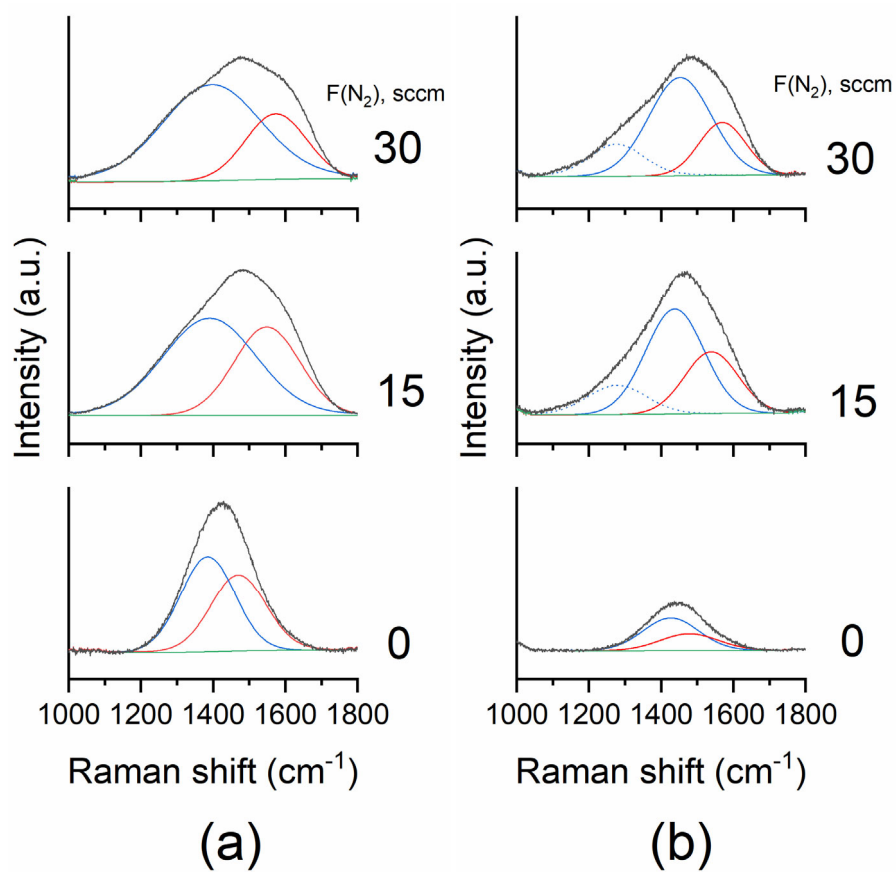

**Figure S2.** Deconvolution of Raman spectra of SiC<sub>x</sub>N<sub>y</sub> films sputtered at (a) 25 and (b) 300 °C.
